# Supplementary material for: PHACTR1 splicing isoforms and eQTLs in atherosclerosis-relevant human cells
Source: PubMed Central journal article supplement (PMC5994109; doi:10.1186/s12881-018-0616-7), 2018-06-08
Supplement: 12881_2018_616_MOESM1_ESM.pdf [file 12881_2018_616_MOESM1_ESM.pdf]

**Additional file 1.** List of primers used in this study. The numbers in the “Name” column refers to the primers shown in **Figure 1**. All sequences are given in the 5’ to 3’ orientation.

|        |          | Forward primers |                                                                       | Reverse primers |                                             |
|--------|----------|-----------------|-----------------------------------------------------------------------|-----------------|---------------------------------------------|
|        |          | Name            | Sequence                                                              | Name            | Sequence                                    |
| RACE   | 1        |                 | gattacgccaagcttGGACTCCCTAGAAAATGGGCAGTCCCTG                           | 4               | gattacgccaagcttGGCCATCCATGATGTCTGACGGTTGG   |
|        | 2        |                 | gattacgccaagcttGAGGAGGACGAAGACGACGACAGCTCATTA                         | 5               | gattacgccaagcttGGCCAGGGAGCTGGTGTATAATGAGCTG |
|        | 3        |                 | gattacgccaagcttGACCGCAGGGCAGATAAGCCGTGGACC                            |                 |                                             |
|        | M13F     |                 | GTAAAACGACGGCCAGT                                                     | M13R            | GGAAACAGCTATGACCATG                         |
| PacBio | dT-BC1   |                 | AAGCAGTGGTATCAACGCAGAGTACTcagacgatgcatTTTTTTTTTTTTTTTTTTTTTTTTTTTTVN, |                 |                                             |
|        | dT-BC2   |                 | AAGCAGTGGTATCAACGCAGAGTACctatacatgactctgcTTTTTTTTTTTTTTTTTTTTTTTTVN,  |                 |                                             |
|        | dT-BC3   |                 | AAGCAGTGGTATCAACGCAGAGTACTactagagtagcactcTTTTTTTTTTTTTTTTTTTTTTTTVN,  |                 |                                             |
|        | dT-BC4   |                 | AAGCAGTGGTATCAACGCAGAGTACtgtgtatcagtacatgTTTTTTTTTTTTTTTTTTTTTTTTVN,  |                 |                                             |
|        | dT-BC5   |                 | AAGCAGTGGTATCAACGCAGAGTACgatctctactatagcTTTTTTTTTTTTTTTTTTTTTTTTVN,   |                 |                                             |
|        | dT-BC6   |                 | AAGCAGTGGTATCAACGCAGAGTACacagctctatactgctgTTTTTTTTTTTTTTTTTTTTTTTTVN  |                 |                                             |
| RT-PCR | 6        |                 | GCGGCATCCTCGGAGGATG                                                   | 9               | TCACTGGCAGACAAGGCAAT                        |
|        | 7        |                 | GGTTGCCTCCAATGTCAAGT                                                  | 9               | TCACTGGCAGACAAGGCAAT                        |
|        | 8        |                 | AGGTTTGCCTCCGTTTCG                                                    | 9               | TCACTGGCAGACAAGGCAAT                        |
|        | 10       |                 | ATGTATCTGCAAGGGCCGAG                                                  | 11              | CTCTTGATCTCTCTCTTCTCCTCCTG                  |
| qPCR   | 12       |                 | AGAGAGGCGGATGCATGTG                                                   | 13              | AGGGAGTCAGAACGCATCG                         |
|        | 8        |                 | AGGTTTGCCTCCGTTTCG                                                    | 13              | AGGGAGTCAGAACGCATCG                         |
|        | 14       |                 | ACCATGAAGAGACCCAGTG                                                   | 9               | TCACTGGCAGACAAGGCAAT                        |
|        | 15       |                 | GGATGGGCCAGATCTGGCG                                                   | 16              | CCTGCTGGCCACTCTTCTGG                        |
|        | 10       |                 | ATGTATCTGCAAGGGCCGAG                                                  | 11              | CTCTTGATCTCTCTCTTCTCCTCCTG                  |
|        | TBP_F    |                 | CGAATATAATCCAAGCGGTTT                                                 | TBP_R           | GTGGTTCGTGGCTCTTATCC                        |
|        | HPRT_F   |                 | TGGCGTCGTGATTAGTGATG                                                  | HPRT_R          | CAGAGGGCTACAATGTGATGG                       |
|        | GapD_H_F |                 | GACAGTCAGCCGCATCTTC                                                   | GapD_H_R        | GCAACAATATCCACTTTACCAGAG                    |
