# Supplementary material for: PHACTR1 splicing isoforms and eQTLs in atherosclerosis-relevant human cells
Source: PubMed Central journal article supplement (PMC5994109; doi:10.1186/s12881-018-0616-7), 2018-06-08
Supplement: 12881_2018_616_MOESM2_ESM.pdf [file 12881_2018_616_MOESM2_ESM.pdf]

**Additional file 2. GTF file.** Genomic coordinates of exons based on the reference human genome sequence GRCh37/hg19.

| seqname | source  | feature | start    | end      | score | strand | frame | attribute                             |
|---------|---------|---------|----------|----------|-------|--------|-------|---------------------------------------|
| 6       | Ensembl | exon    | 12957636 | 12957776 | .     | +      | .     | transcript_id "with"; exon_id "06"    |
| 6       | Ensembl | exon    | 12958214 | 12958269 | .     | +      | .     | transcript_id "with"; exon_id "07"    |
| 6       | Ensembl | exon    | 13013852 | 13014371 | .     | +      | .     | transcript_id "with"; exon_id "78"    |
| 6       | Ensembl | exon    | 13053597 | 13053761 | .     | +      | .     | transcript_id "with"; exon_id "08"    |
| 6       | Ensembl | exon    | 13160436 | 13160516 | .     | +      | .     | transcript_id "with"; exon_id "09"    |
| 6       | Ensembl | exon    | 13182751 | 13182918 | .     | +      | .     | transcript_id "with"; exon_id "10"    |
| 6       | Ensembl | exon    | 13185031 | 13185237 | .     | +      | .     | transcript_id "with"; exon_id "1011"  |
| 6       | Ensembl | exon    | 13206047 | 13206368 | .     | +      | .     | transcript_id "with"; exon_id "11"    |
| 6       | Ensembl | exon    | 13228048 | 13228295 | .     | +      | .     | transcript_id "with"; exon_id "12"    |
| 6       | Ensembl | exon    | 13230269 | 13230425 | .     | +      | .     | transcript_id "with"; exon_id "13"    |
| 6       | Ensembl | exon    | 13273092 | 13273147 | .     | +      | .     | transcript_id "with"; exon_id "14"    |
| 6       | Ensembl | exon    | 13278500 | 13278561 | .     | +      | .     | transcript_id "with"; exon_id "15"    |
| 6       | Ensembl | exon    | 13283654 | 13283794 | .     | +      | .     | transcript_id "with"; exon_id "16"    |
| 6       | Ensembl | exon    | 13286378 | 13286454 | .     | +      | .     | transcript_id "with"; exon_id "17"    |
| 6       | Ensembl | exon    | 13287295 | 13288073 | .     | +      | .     | transcript_id "with"; exon_id "18"    |
| 6       | Ensembl | exon    | 12957636 | 12957776 | .     | +      | .     | transcript_id "without"; exon_id "06" |
| 6       | Ensembl | exon    | 12958214 | 12958269 | .     | +      | .     | transcript_id "without"; exon_id "07" |
| 6       | Ensembl | exon    | 13013852 | 13014371 | .     | +      | .     | transcript_id "without"; exon_id "78" |
| 6       | Ensembl | exon    | 13053597 | 13053761 | .     | +      | .     | transcript_id "without"; exon_id "08" |
| 6       | Ensembl | exon    | 13160436 | 13160516 | .     | +      | .     | transcript_id "without"; exon_id "09" |
| 6       | Ensembl | exon    | 13182751 | 13182918 | .     | +      | .     | transcript_id "without"; exon_id "10" |
| 6       | Ensembl | exon    | 13206047 | 13206368 | .     | +      | .     | transcript_id "without"; exon_id "11" |
| 6       | Ensembl | exon    | 13228048 | 13228295 | .     | +      | .     | transcript_id "without"; exon_id "12" |
| 6       | Ensembl | exon    | 13230269 | 13230425 | .     | +      | .     | transcript_id "without"; exon_id "13" |
| 6       | Ensembl | exon    | 13273092 | 13273147 | .     | +      | .     | transcript_id "without"; exon_id "14" |
| 6       | Ensembl | exon    | 13278500 | 13278561 | .     | +      | .     | transcript_id "without"; exon_id "15" |
| 6       | Ensembl | exon    | 13283654 | 13283794 | .     | +      | .     | transcript_id "without"; exon_id "16" |
| 6       | Ensembl | exon    | 13286378 | 13286454 | .     | +      | .     | transcript_id "without"; exon_id "17" |
| 6       | Ensembl | exon    | 13287295 | 13288073 | .     | +      | .     | transcript_id "without"; exon_id "18" |
| 6       | Ensembl | exon    | 13272908 | 13273091 | .     | +      | .     | transcript_id "short"; exon_id "av14" |
| 6       | Ensembl | exon    | 13273092 | 13273147 | .     | +      | .     | transcript_id "short"; exon_id "14"   |
| 6       | Ensembl | exon    | 13278500 | 13278561 | .     | +      | .     | transcript_id "short"; exon_id "15"   |
| 6       | Ensembl | exon    | 13283654 | 13283794 | .     | +      | .     | transcript_id "short"; exon_id "16"   |
| 6       | Ensembl | exon    | 13286378 | 13286454 | .     | +      | .     | transcript_id "short"; exon_id "17"   |
| 6       | Ensembl | exon    | 13287295 | 13288073 | .     | +      | .     | transcript_id "short"; exon_id "18"   |
