# Supplementary material for: PHACTR1 splicing isoforms and eQTLs in atherosclerosis-relevant human cells
Source: PubMed Central journal article supplement (PMC5994109; doi:10.1186/s12881-018-0616-7), 2018-06-08

**Additional file 3. Summary of observed transcripts with their alternatively spliced 5' and 3' untranslated regions (UTRs).** The blue rectangles on the left indicate transcripts that were detected in tissue samples whereas gray rectangles mean they were not detected. Introns are not shown for simplicity; black lines indicate that the exons were not present in the isoform.

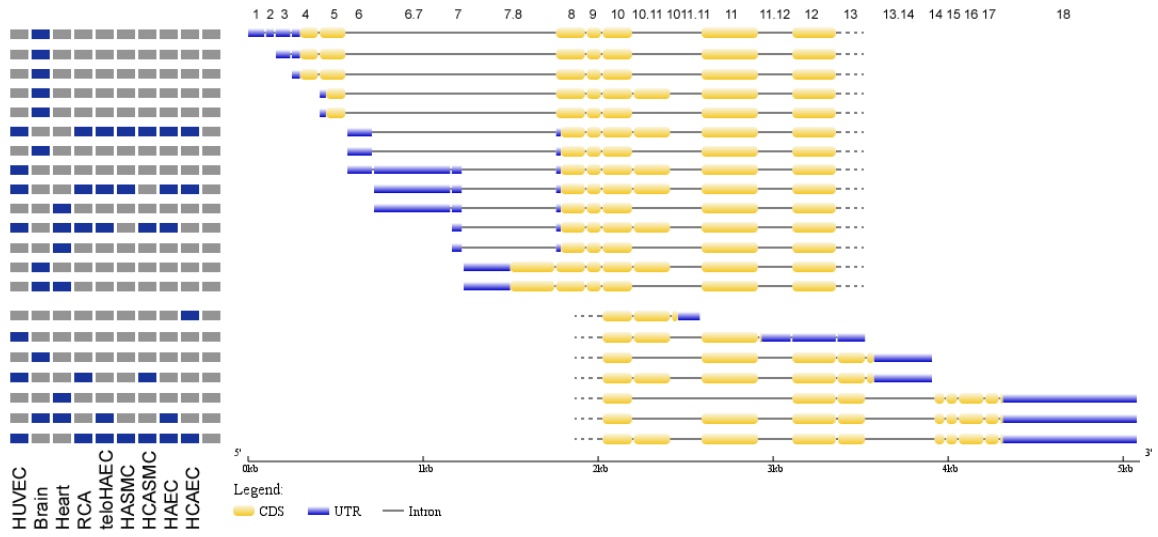

Supplement: 12881_2018_616_MOESM3_ESM.pdf [file 12881_2018_616_MOESM3_ESM.pdf]
