# Supplementary material for: PHACTR1 splicing isoforms and eQTLs in atherosclerosis-relevant human cells
Source: PubMed Central journal article supplement (PMC5994109; doi:10.1186/s12881-018-0616-7), 2018-06-08

**Additional file 5. Zoom-in representation of *PHACTR1* exon 14.** The 5'-14 fraction of exon 14 is specific to the short immune-specific *PHACTR1* transcript. We also illustrate the 3' splice site used for the long and intermediate *PHACTR1* transcripts. In blue is the intron between exons 13 and 14. The red arrow indicates a primer used to detect the short *PHACTR1* transcript. The sequence of this primer #9 is in **Additional file 1.**

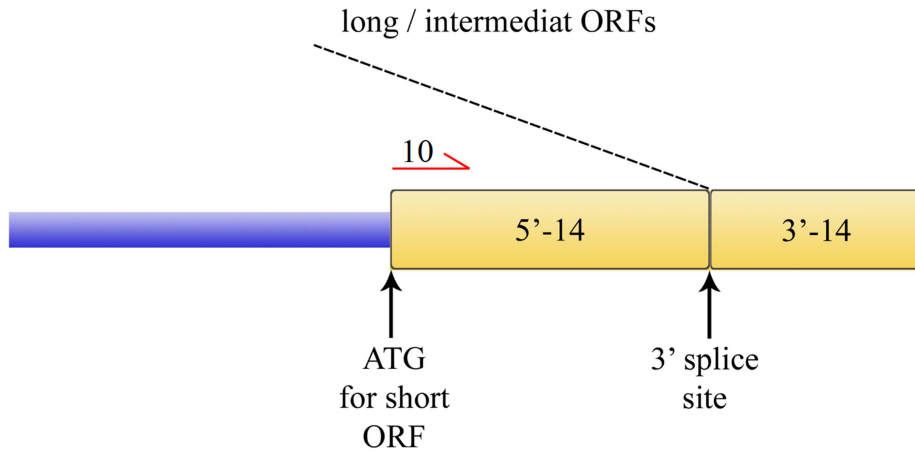

Supplement: 12881_2018_616_MOESM5_ESM.pdf [file 12881_2018_616_MOESM5_ESM.pdf]
