# Supplementary material for: PHACTR1 splicing isoforms and eQTLs in atherosclerosis-relevant human cells
Source: PubMed Central journal article supplement (PMC5994109; doi:10.1186/s12881-018-0616-7), 2018-06-08

**Additional file 6. Associations between genotypes at rs9349379 and *PHACTR1* expression levels in human coronary arteries.** (A) By qPCR using transcript-specific primers, we measured the expression of *PHACTR1* transcripts in 36 human coronary arteries (hCA) ( $N_{AA}=15$ ,  $N_{AG}=13$ ,  $N_{GG}=8$ ). The long *PHACTR1* transcript is not expressed in hCA. (B) We used GTEx data to test the associations between rs9349379 and the expression levels of *PHACTR1* exons in 122 hCA ( $N_{AA}=48$ ,  $N_{AG}=57$ ,  $N_{GG}=17$ ). Here, we only show results for four exons, but association results for all *PHACTR1* exons are available in **Table 2**. Suppl. exon corresponds to the alternatively spliced exon located between exons 10 and 11. 5' exon 14 corresponds to part of exon 14 that is specific to the short *PHACTR1* transcript.

A

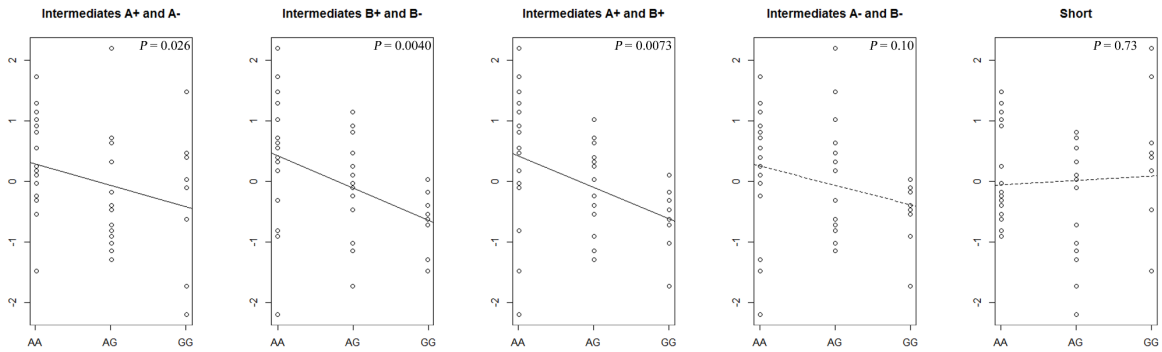

B

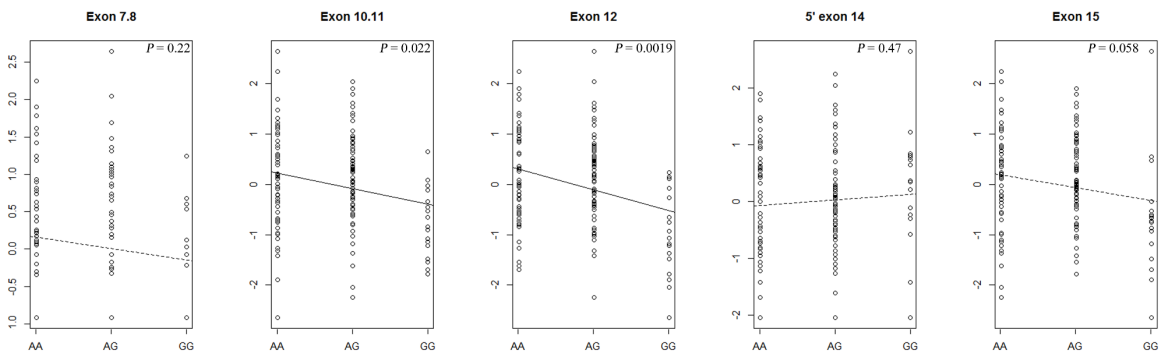

Supplement: 12881_2018_616_MOESM6_ESM.pdf [file 12881_2018_616_MOESM6_ESM.pdf]
