# Supplementary material for: PHACTR1 splicing isoforms and eQTLs in atherosclerosis-relevant human cells
Source: Springer Nature journal article supplement (doi:10.1186/s12881-018-0616-7), 2018-06-08
Supplement: MOESM4 [file 15831828]

**Additional file 4. T ranscript and protein IDs of *PHACTR1* gene (221692; ENSG00000112137).**

|                 | Length (bp) | Transcript IDs                     | Length (aa) | Protein IDs    |
|-----------------|-------------|------------------------------------|-------------|----------------|
| Long            | 1743        | NM_030948.3,<br>ENST00000332995.11 | 580         | NP_112210.1    |
| Intermediate A- | 1746        | XM_017010464.1                     | 581         | XP_016865953.1 |
| Intermediate A+ | 1953        | NM_001322314.1                     | 650         | NP_001309243.1 |
| Intermediate B- | 1467        | NM_001322312.1                     | 488         | NP_001309241.1 |
| Intermediate B+ | 1674        | NM_001322313.1                     | 557         | NP_001309242.1 |
| Short           | 435         | ENST00000379335.7                  | 144         | EAW55320.1     |
